# Supplementary material for: Global gene expression reveals stress-responsive genes in Aspergillus fumigatus mycelia
Source: PubMed Central journal article supplement (PMC5715996; doi:10.1186/s12864-017-4316-z), 2017-12-04

# Figure S3

## a

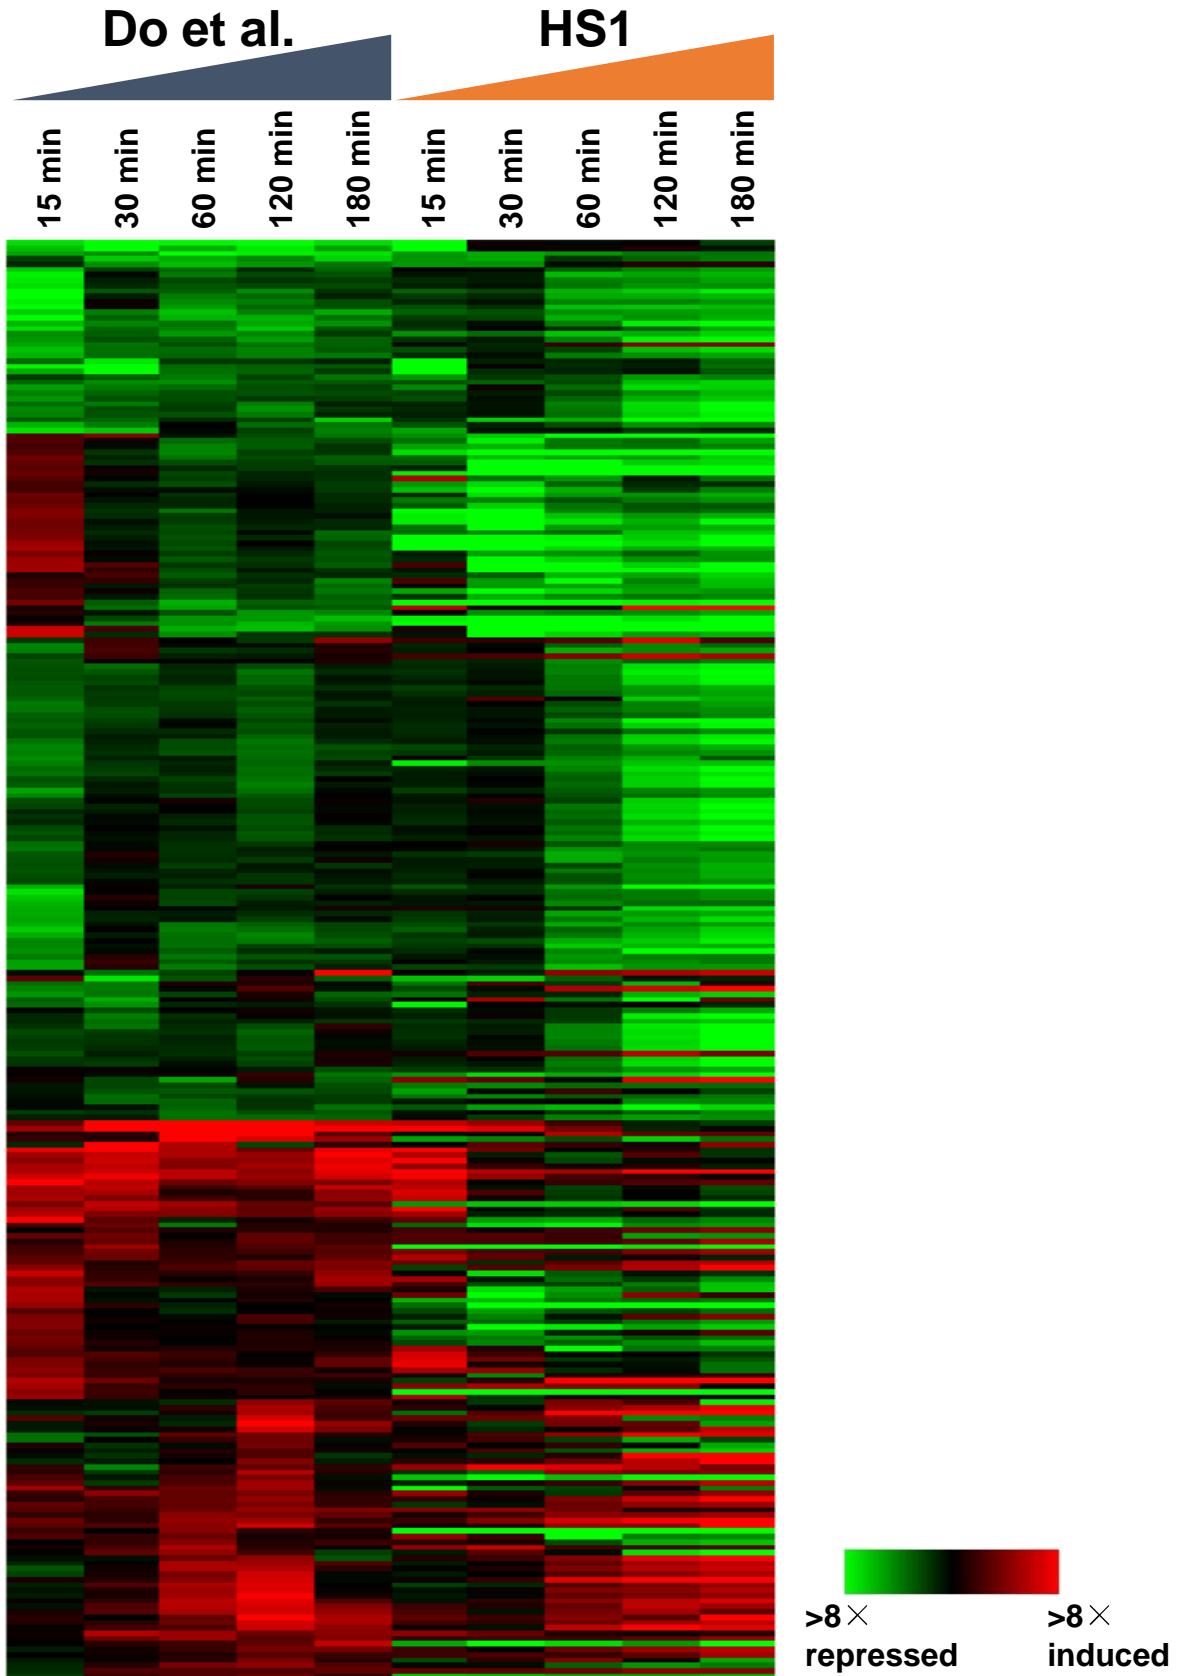

**b**

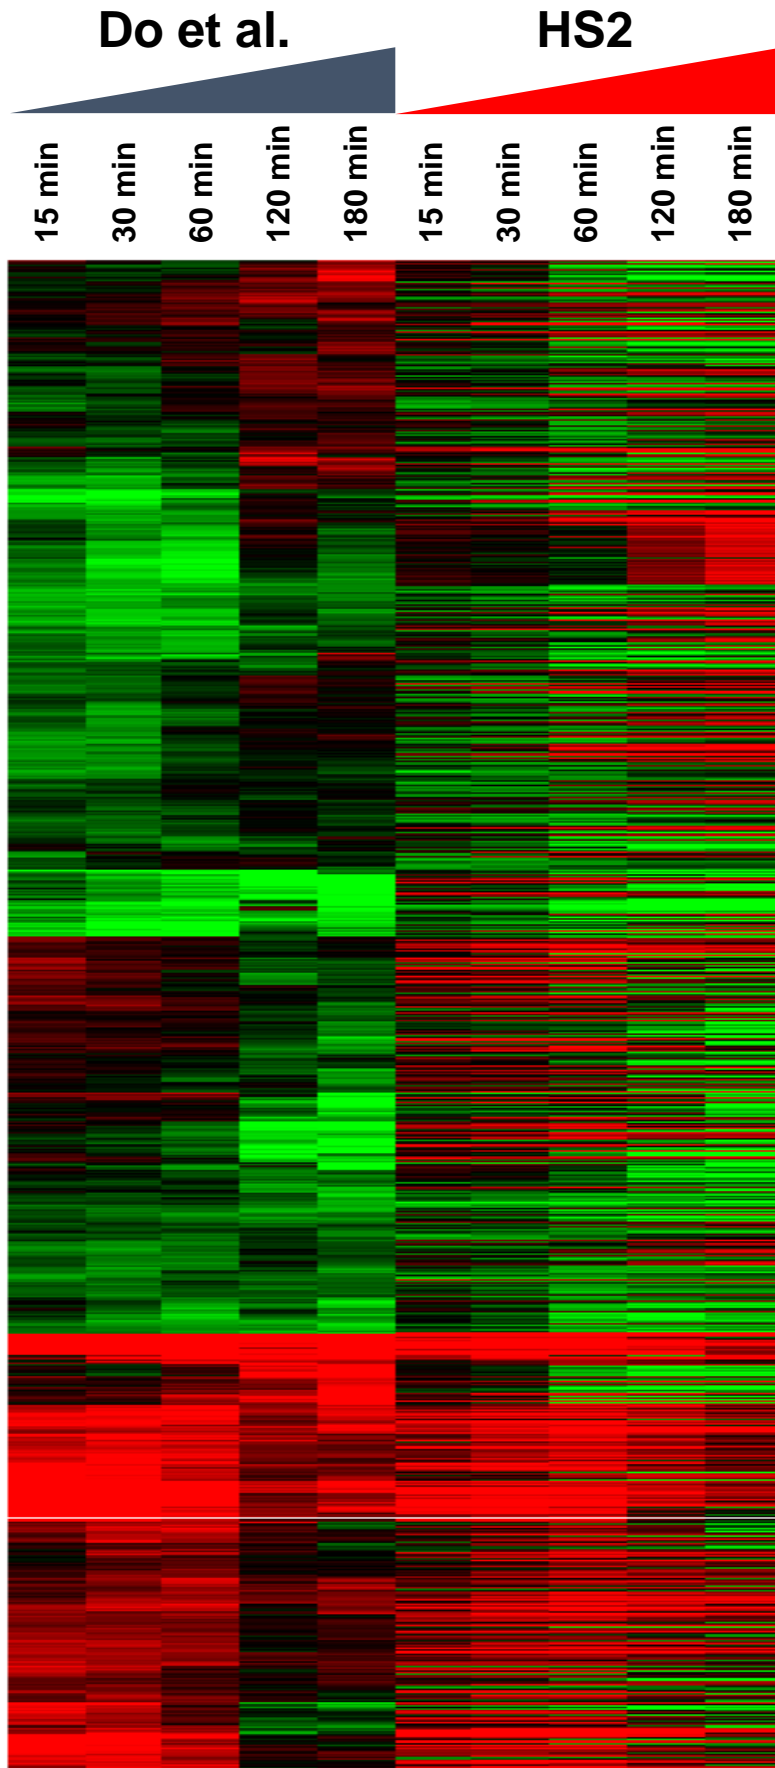

Supplement: 12864_2017_4316_MOESM6_ESM.pdf [file 12864_2017_4316_MOESM6_ESM.pdf]
